# Supplementary material for: Screening and Analysis of Serum Protein Biomarkers Infected by Coronavirus Disease 2019 (COVID-19)
Source: MDPI journal article supplement (doi:10.3390/tropicalmed7120397), 2022-11-25
Supplement: s1 [file s1]

# Supplementary Material

## Summary of the identified proteins in this study: Repeatability

| Pearson's correlation of quantitation |        |        |        |        |       |         |         |         |         |         |         |         |
|---------------------------------------|--------|--------|--------|--------|-------|---------|---------|---------|---------|---------|---------|---------|
|                                       | Q1_TCH | Q2_ZWB | Q3_WJH | Q5_JYJ | Q9_CT | Q11_CCH | Q14_SZF | Q16_CJQ | Q17_CGS | Q20_BXX | Q32_LJM | Q33_JYH |
| Q1_TCH                                | 1.00   | 0.83   | 0.79   | 0.74   | 0.76  | 0.73    | 0.82    | 0.80    | 0.71    | 0.72    | 0.78    | 0.70    |
| Q2_ZWB                                | 0.83   | 1.00   | 0.82   | 0.71   | 0.78  | 0.76    | 0.82    | 0.78    | 0.73    | 0.70    | 0.79    | 0.68    |
| Q3_WJH                                | 0.79   | 0.82   | 1.00   | 0.71   | 0.82  | 0.84    | 0.82    | 0.83    | 0.77    | 0.74    | 0.80    | 0.68    |
| Q5_JYJ                                | 0.74   | 0.71   | 0.71   | 1.00   | 0.71  | 0.69    | 0.76    | 0.68    | 0.68    | 0.65    | 0.70    | 0.62    |
| Q9_CT                                 | 0.76   | 0.78   | 0.82   | 0.71   | 1.00  | 0.82    | 0.80    | 0.79    | 0.78    | 0.78    | 0.81    | 0.65    |
| Q11_CCH                               | 0.73   | 0.76   | 0.84   | 0.69   | 0.82  | 1.00    | 0.75    | 0.78    | 0.78    | 0.75    | 0.81    | 0.71    |
| Q14_SZF                               | 0.82   | 0.82   | 0.82   | 0.76   | 0.80  | 0.75    | 1.00    | 0.82    | 0.77    | 0.76    | 0.80    | 0.68    |
| Q16_CJQ                               | 0.80   | 0.78   | 0.83   | 0.68   | 0.79  | 0.78    | 0.82    | 1.00    | 0.79    | 0.80    | 0.81    | 0.66    |
| Q17_CGS                               | 0.71   | 0.73   | 0.77   | 0.68   | 0.78  | 0.78    | 0.77    | 0.79    | 1.00    | 0.72    | 0.72    | 0.60    |
| Q20_BXX                               | 0.72   | 0.70   | 0.74   | 0.65   | 0.78  | 0.75    | 0.76    | 0.80    | 0.72    | 1.00    | 0.82    | 0.68    |
| Q32_LJM                               | 0.78   | 0.79   | 0.80   | 0.70   | 0.81  | 0.81    | 0.80    | 0.81    | 0.72    | 0.82    | 1.00    | 0.69    |
| Q33_JYH                               | 0.70   | 0.68   | 0.68   | 0.62   | 0.65  | 0.71    | 0.68    | 0.66    | 0.60    | 0.68    | 0.69    | 1.00    |

Figure S1. Heatmap of Pearson correlation coefficients from all quantified proteins.

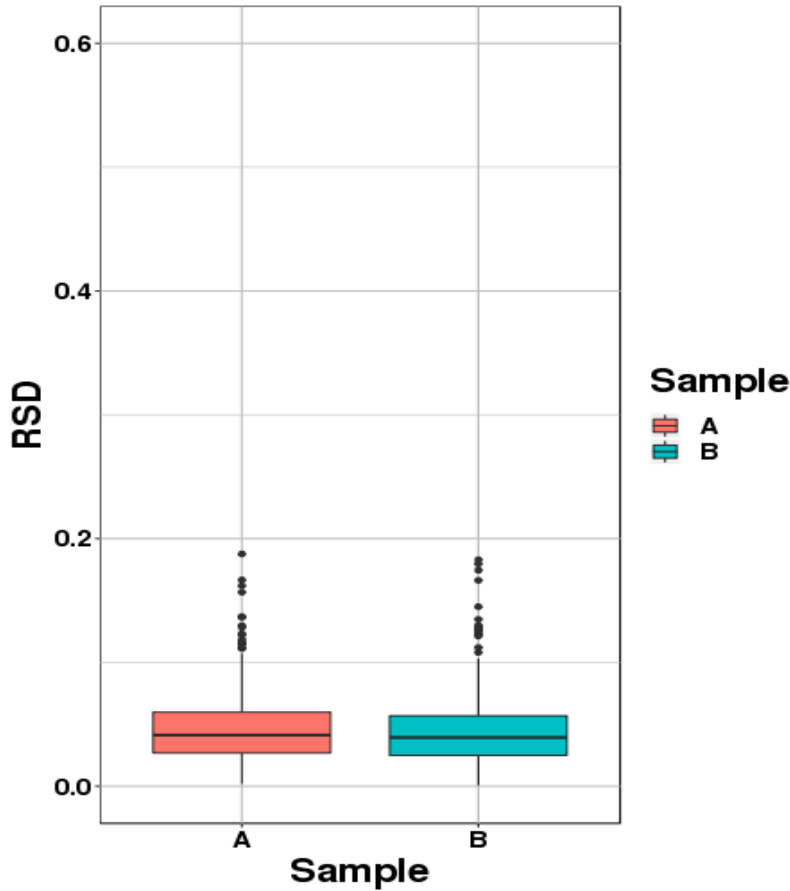

Figure S2. Box plot of RSD (Relative Standard Deviation) distribution of repeated samples using quantified proteins.

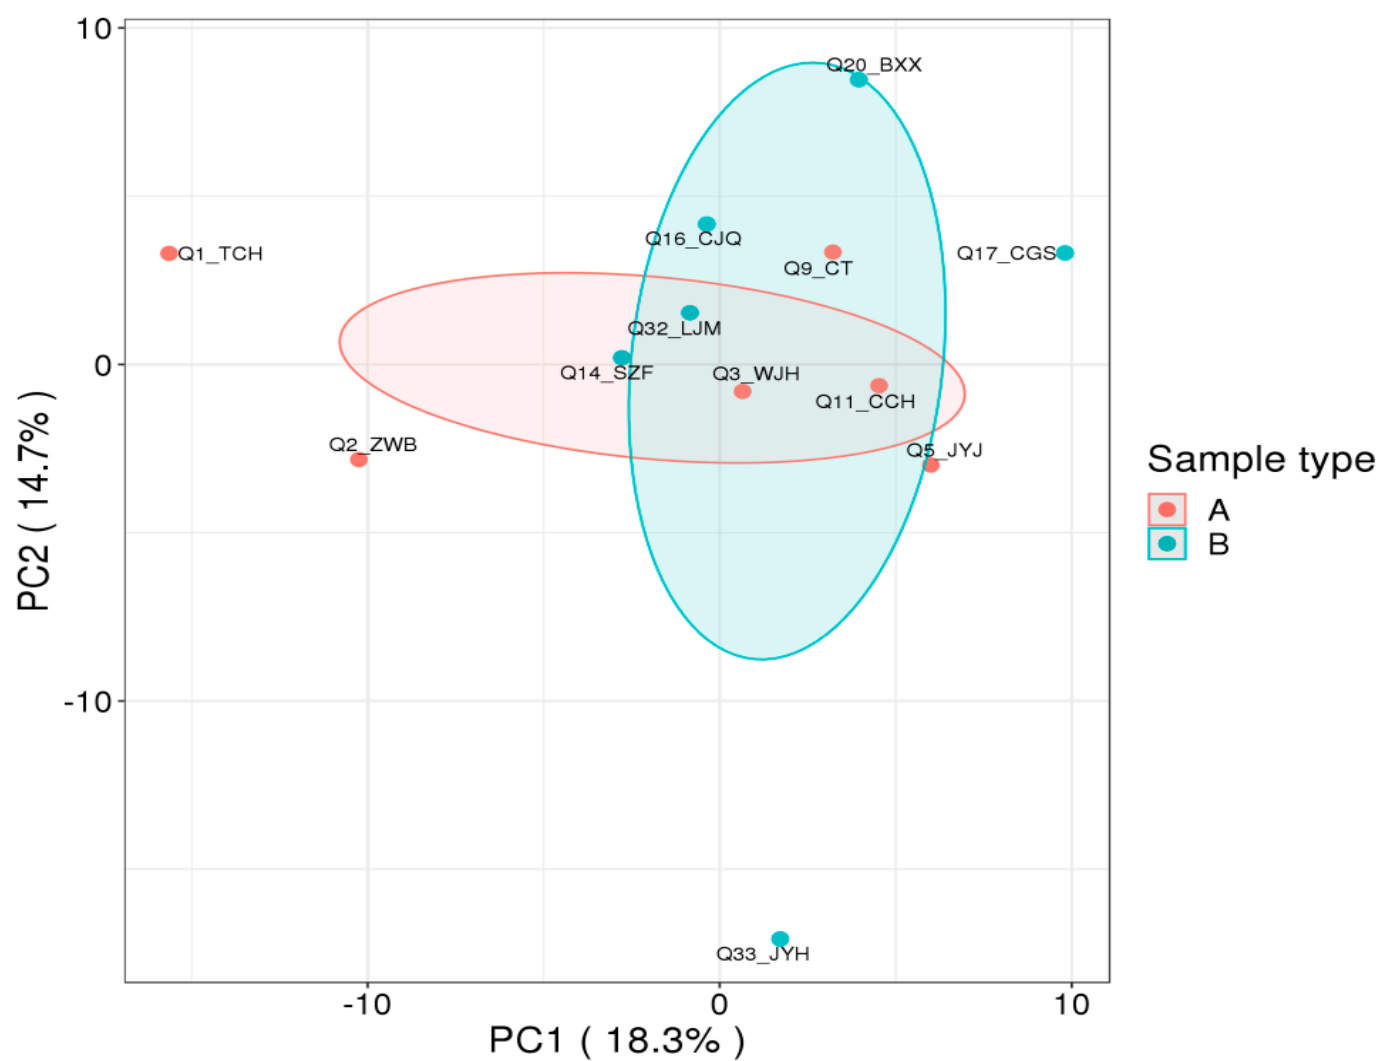

**Figure 3.** Two-dimensional scatter plot of PCA (principal component analysis) distribution of all samples using quantified proteins
